# Supplementary material
Source: HighWire-hosted journal article supplement (https://qualitysafety.bmj.com/content/30/5/380)
Supplement: inline-supplementary-material-3 [file inline-supplementary-material-3.pdf]

## Descriptive statistics of incidents and actions taken by Nurses Category A and B.

**Table 1** Incidents reported by nurses category A and B, per technology (n=181)

| Incidents    | Infusion therapy |                 | Parenteral nutrition |                 | Morphine pump    |                 |
|--------------|------------------|-----------------|----------------------|-----------------|------------------|-----------------|
|              | A                | B               | A                    | B               | A                | B               |
|              | n (%)            | n (%)           | n (%)                | n (%)           | n (%)            | n (%)           |
| 0            | 78 (69.0)        | 63 (92.6)       | 104 (92.0)           | 66 (97.1)       | 89 (78.8)        | 60 (88.2)       |
| 1            | 14 (12.4)        | 4 (5.9)         | 8 (7.1)              | 2 (2.9)         | 18 (15.9)        | 8 (11.8)        |
| 2 or more    | 21 (18.6)        | 1 (1.5)         | 1 (0.9)              | 0 (0.0)         | 6 (5.3)          | 0 (0.0)         |
| <b>Total</b> | <b>113 (100)</b> | <b>68 (100)</b> | <b>113 (100)</b>     | <b>68 (100)</b> | <b>113 (100)</b> | <b>68 (100)</b> |

**Table 2** Types of incidents reported by nurses category A and B, per technology (n=129)

| Incidents mainly attributed to                                                 | Infusion therapy |                 | Parenteral nutrition |                 | Morphine pump    |                 |
|--------------------------------------------------------------------------------|------------------|-----------------|----------------------|-----------------|------------------|-----------------|
|                                                                                | A                | B               | A                    | B               | A                | B               |
|                                                                                | n (%)            | n (%)           | n (%)                | n (%)           | n (%)            | n (%)           |
| <b>Product</b>                                                                 | <b>32 (46.4)</b> | <b>4 (57.1)</b> | <b>6 (60.0)</b>      | <b>0 (0.0)</b>  | <b>10 (30.3)</b> | <b>6 (75.0)</b> |
| Technical defect in the device                                                 | 12 (17.4)        | 2 (28.6)        | 5 (50.0)             | 0 (0.0)         | 5 (15.2)         | 5 (62.5)        |
| Correct device not present or device component(s) missing                      | 10 (14.5)        | 1 (14.3)        | 0 (0.0)              | 0 (0.0)         | 2 (6.1)          | 0 (0.0)         |
| Manual unclear, incomplete, not available or unsuitable for the home situation | 0 (0.0)          | 1 (14.3)        | 0 (0.0)              | 0 (0.0)         | 0 (0.0)          | 0 (0.0)         |
| Device unsuitable for the home situation, because .....                        | 1 (1.4)          | 0 (0.0)         | 0 (0.0)              | 0 (0.0)         | 0 (0.0)          | 0 (0.0)         |
| Incorrect medication preparation, administration or delivery                   | 5 (7.2)          | 0 (0.0)         | 1 (10.0)             | 0 (0.0)         | 3 (9.1)          | 1 (12.5)        |
| Other, namely .....                                                            | 4 (5.8)          | 0 (0.0)         | 0 (0.0)              | 0 (0.0)         | 0 (0.0)          | 0 (0.0)         |
| <b>Environment</b>                                                             | <b>8 (11.6)</b>  | <b>2 (28.6)</b> | <b>1 (10.0)</b>      | <b>0 (0.0)</b>  | <b>3 (9.1)</b>   | <b>0 (0.0)</b>  |
| Climate in the room (e.g. temperature, humidity, lighting, noise)              | 0 (0.0)          | 0 (0.0)         | 0 (0.0)              | 0 (0.0)         | 1 (3.0)          | 0 (0.0)         |
| Hygiene of the room                                                            | 1 (1.4)          | 0 (0.0)         | 0 (0.0)              | 0 (0.0)         | 0 (0.0)          | 0 (0.0)         |
| Room too small                                                                 | 0 (0.0)          | 0 (0.0)         | 0 (0.0)              | 0 (0.0)         | 0 (0.0)          | 0 (0.0)         |
| Presence of children                                                           | 0 (0.0)          | 0 (0.0)         | 0 (0.0)              | 0 (0.0)         | 0 (0.0)          | 0 (0.0)         |
| Presence of pets                                                               | 0 (0.0)          | 0 (0.0)         | 1 (10.0)             | 0 (0.0)         | 0 (0.0)          | 0 (0.0)         |
| Power failure or interference with other electrical devices                    | 0 (0.0)          | 0 (0.0)         | 0 (0.0)              | 0 (0.0)         | 0 (0.0)          | 0 (0.0)         |
| Incorrect use by patient and/or informal caregiver(s)                          | 6 (8.7)          | 1 (14.3)        | 0 (0.0)              | 0 (0.0)         | 1 (3.0)          | 0 (0.0)         |
| Other, namely .....                                                            | 1 (1.4)          | 1 (14.3)        | 0 (0.0)              | 0 (0.0)         | 1 (3.0)          | 0 (0.0)         |
| <b>Organization of care</b>                                                    | <b>19 (27.5)</b> | <b>1 (14.3)</b> | <b>3 (30.0)</b>      | <b>1 (50.0)</b> | <b>11 (33.3)</b> | <b>1 (12.5)</b> |
| Unclear tasks, responsibilities and/or authorizations                          | 3 (4.3)          | 0 (0.0)         | 1 (10.0)             | 1 (50.0)        | 2 (6.1)          | 0 (0.0)         |
| Error or transfer error by a colleague or other healthcare professional        | 13 (18.8)        | 1 (14.3)        | 2 (20.0)             | 0 (0.0)         | 8 (24.2)         | 1 (12.5)        |
| Poor maintenance of the device, including cleaning                             | 2 (2.9)          | 0 (0.0)         | 0 (0.0)              | 0 (0.0)         | 0 (0.0)          | 0 (0.0)         |
| Other, namely .....                                                            | 1 (1.4)          | 0 (0.0)         | 0 (0.0)              | 0 (0.0)         | 1 (3.0)          | 0 (0.0)         |
| <b>Human factors: Yourself as a user</b>                                       | <b>10 (14.5)</b> | <b>0 (0.0)</b>  | <b>0 (0.0)</b>       | <b>1 (50.0)</b> | <b>9 (27.3)</b>  | <b>1 (12.5)</b> |
| Insufficient knowledge/skills regarding the use of the device                  | 0 (0.0)          | 0 (0.0)         | 0 (0.0)              | 0 (0.0)         | 1 (3.0)          | 0 (0.0)         |
| Stress or fatigue                                                              | 0 (0.0)          | 0 (0.0)         | 0 (0.0)              | 0 (0.0)         | 0 (0.0)          | 0 (0.0)         |
| Inattention or error                                                           | 7 (10.1)         | 0 (0.0)         | 0 (0.0)              | 1 (50.0)        | 4 (12.1)         | 1 (12.5)        |
| Failure in situational awareness                                               | 1 (1.4)          | 0 (0.0)         | 0 (0.0)              | 0 (0.0)         | 0 (0.0)          | 0 (0.0)         |
| Incorrect calculation of medication                                            | 1 (1.4)          | 0 (0.0)         | 0 (0.0)              | 0 (0.0)         | 4 (12.1)         | 0 (0.0)         |
| Other, namely .....                                                            | 1 (1.4)          | 0 (0.0)         | 0 (0.0)              | 0 (0.0)         | 0 (0.0)          | 0 (0.0)         |
| <b>Total</b>                                                                   | <b>69 (100)</b>  | <b>7 (100)</b>  | <b>10 (100)</b>      | <b>2 (100)</b>  | <b>33 (100)</b>  | <b>8 (100)</b>  |

**Table 3** Actions taken by nurses category A and B to discuss or reveal incidents, per technology (n=119, 10 missing)

| Actions taken                                                  | Infusion therapy |                | Parenteral nutrition |                | Morphine pump   |                |
|----------------------------------------------------------------|------------------|----------------|----------------------|----------------|-----------------|----------------|
|                                                                | A                | B              | A                    | B              | A               | B              |
|                                                                | n (%)            | n (%)          | n (%)                | n (%)          | n (%)           | n (%)          |
| Yes                                                            | 56 (86.2)        | 5 (83.3)       | 8 (80.0)             | 1 (100)        | 28 (93.3)       | 7 (100)        |
| No                                                             | 9 (13.8)         | 1 (16.7)       | 2 (20.0)             | 0 (0.0)        | 2 (6.7)         | 0 (0.0)        |
| <b>Total</b>                                                   | <b>65 (100)</b>  | <b>6 (100)</b> | <b>10 (100)</b>      | <b>1 (100)</b> | <b>30 (100)</b> | <b>7 (100)</b> |
| <b>Specification Yes (multiple answers possible)</b>           |                  |                |                      |                |                 |                |
| Discussed it with colleagues in the team                       | 36 (64.3)        | 5 (100)        | 6 (75.0)             | 0 (0.0)        | 23 (82.1)       | 5 (71.4)       |
| Discussed it with the direct supervisor                        | 5 (8.9)          | 0 (0.0)        | 0 (0.0)              | 0 (0.0)        | 2 (7.1)         | 0 (0.0)        |
| Discussed it with the patient and/or the informal caregiver(s) | 34 (60.7)        | 2 (40.0)       | 4 (50.0)             | 1 (100)        | 7 (25.0)        | 2 (28.6)       |
| Discussed it with the attending physician                      | 12 (21.4)        | 1 (20.0)       | 0 (0.0)              | 0 (0.0)        | 8 (28.6)        | 0 (0.0)        |
| Made a report according to the protocol of the organization    | 12 (21.4)        | 0 (0.0)        | 0 (0.0)              | 0 (0.0)        | 5 (17.9)        | 1 (14.3)       |
| Other, namely .....                                            | 25 (44.6)        | 1 (20.0)       | 2 (25.0)             | 0 (0.0)        | 8 (28.6)        | 6 (85.7)       |
| <b>Specification No (multiple answers possible)</b>            |                  |                |                      |                |                 |                |
| Lack of time                                                   | 0 (0.0)          | 0 (0.0)        | 0 (0.0)              | 0 (0.0)        | 0 (0.0)         | 0 (0.0)        |
| Don't know which action(s) I should take or how                | 1 (11.1)         | 0 (0.0)        | 0 (0.0)              | 0 (0.0)        | 0 (0.0)         | 0 (0.0)        |
| Don't know whether the event is worth reporting or discussing  | 4 (44.4)         | 0 (0.0)        | 0 (0.0)              | 0 (0.0)        | 0 (0.0)         | 0 (0.0)        |
| Don't know the potential consequences with regard to liability | 1 (11.1)         | 0 (0.0)        | 0 (0.0)              | 0 (0.0)        | 0 (0.0)         | 0 (0.0)        |
| Fear of sanctions or punishment against me                     | 0 (0.0)          | 0 (0.0)        | 0 (0.0)              | 0 (0.0)        | 0 (0.0)         | 0 (0.0)        |
| Other, namely .....                                            | 5 (55.6)         | 1 (100)        | 2 (100)              | 0 (0.0)        | 2 (100)         | 0 (0.0)        |
